# Supplementary material for: Hierarchical flower-like nickel phenylphosphonate microspheres and their calcined derivatives for supercapacitor electrodes
Source: Royal Society of Chemistry journal article supplement (doi:10.1039/c7ta00775b), 2017-01-01
Supplement: c7ta00775b1.pdf [file c7ta00775b1.pdf]

**Supplementary Information Available**

# Hierarchical Flower-like Nickel Phenylphosphonate Microspheres and Their Calcined Derivatives for Supercapacitor Electrode

Fan Zhang<sup>‡</sup>, Yuanyuan Bao<sup>‡</sup>, Shuangshuang Ma, Lu Liu, and Xin Shi\*

Institute of Chemistry for Functionalized Materials, School of Chemistry and  
Chemical Engineering, Liaoning Normal University, 850 Huanghe Road, Dalian  
116029, China. (‡These authors contributed equally to this work)

**Fig. S1** SEM images of nickel phenylphosphonates synthesized with different hydrothermal reaction time: (a) 2 h; (b) 4 h; (c) 6 h; (d) 8 h.

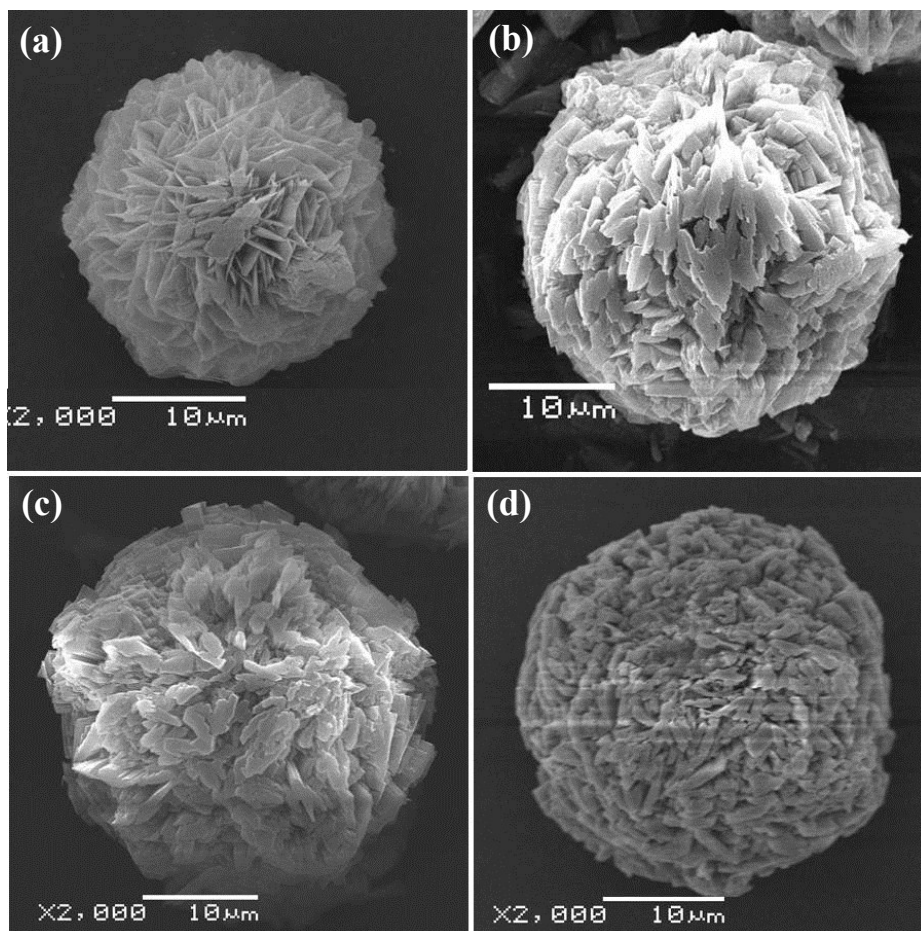

**Fig. S2** FT-IR spectra of PPA (phenylphosphonic acid) and NiPP.

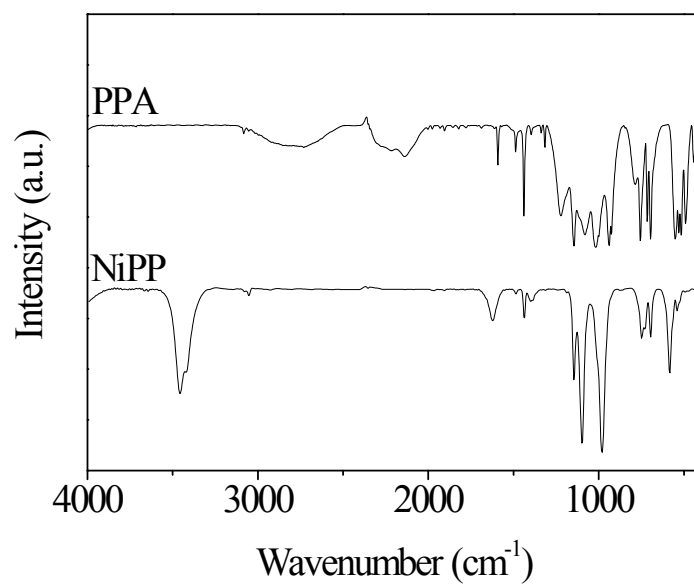

**Fig. S3** (a) XPS survey spectrum of NiPP and the high-resolution XPS spectra of (b) Ni 2p; (c) P 2p; (d) C 1s; (e) O 1s.

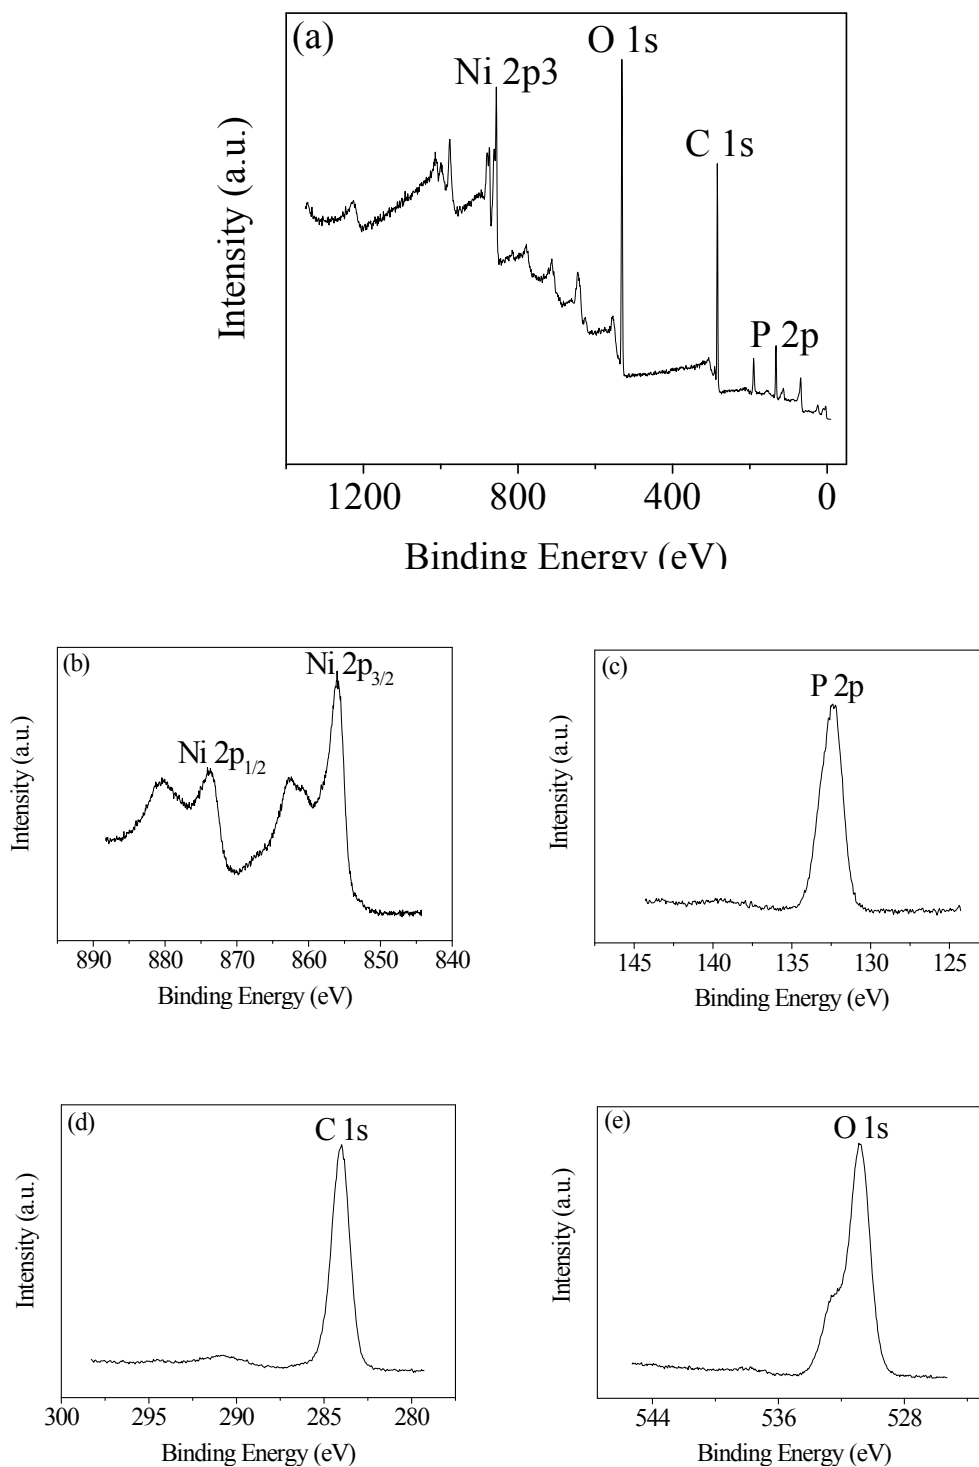

**Fig. S4** TG-DTA curve of NiPP.

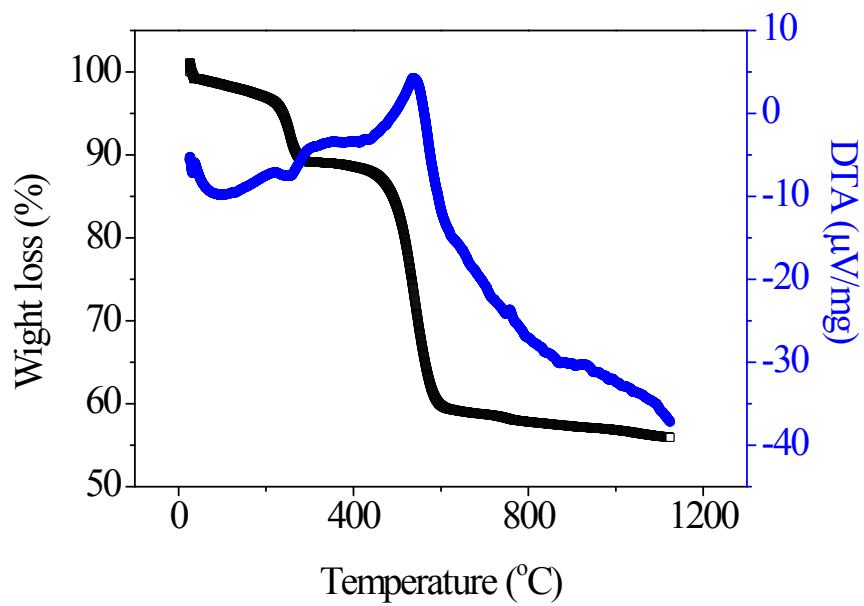

**Fig. S5** The specific capacitances vs. different current densities ( $0.5 \text{ A g}^{-1}$  to  $8 \text{ A g}^{-1}$ ), i.e., rate capability of four electrode materials.

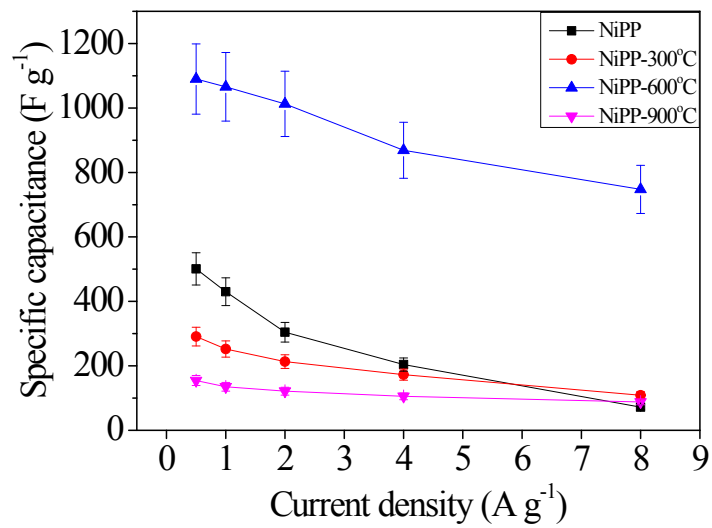

**Fig. S6** Ragone plots of four electrode materials.

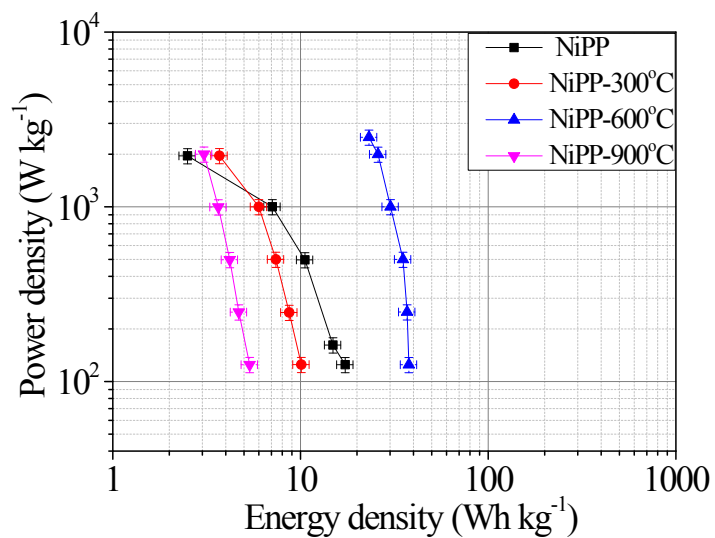

The formula calculation for specific capacitance ( $C$ ), energy density ( $E$ ) and power density ( $P$ ) as follows (1)–(3):<sup>1,2</sup>

$$C (F g^{-1}) = \frac{I\Delta t}{m\Delta V} \quad (1)$$

$$(Wh kg^{-1}) = \frac{I\Delta V\Delta t}{m} \quad (2)$$

$$(W kg^{-1}) = \frac{I\Delta V}{m} \quad (3)$$

Where  $I$  is current,  $\Delta t$  is discharging time,  $m$  is mass of active material, and  $\Delta V$  is potential difference.

[1] K. Raju, K. I. Ozoemena, *Scientific Reports*, 2015, 17629.

[2] B. Senthikumar, Z. Khan, S. Park, K. Kim, H. Ko, Y. Kim, *J. Mater. Chem. A*, 2015, **3**, 21553–21561.
